# Supplementary material
Source: publisher figshare collection journal article supplement (https://sage.figshare.com/ndownloader/files/18542114)
Supplement: Supplementary file 1 [file 18542114]

**Table I. Comparison of socio-demographic information in surveys (%).**

| <b>Authors</b>                  |                                                                    | Dingerkus et al. | Stahel & Schoen     |
|---------------------------------|--------------------------------------------------------------------|------------------|---------------------|
| <b>Year of survey</b>           |                                                                    | 2015             | 2017                |
| <b>Estimated population (N)</b> |                                                                    | 10'500 (or less) | 10'500 (or less)    |
| <b>Sample (N)</b>               |                                                                    | 909              | 637                 |
| <b>Region</b>                   | German speaking                                                    | 73               | 81                  |
|                                 | French speaking                                                    | 19               | 13                  |
|                                 | Italian speaking                                                   | 8                | 6                   |
|                                 | Total %                                                            | 100              | 100                 |
| <b>Sex</b>                      | Female                                                             | 39               | 35                  |
| <b>Age</b>                      | Mean Age                                                           | 42               | 46                  |
| <b>Education</b>                | Compulsory                                                         | 9                | 2                   |
|                                 | Secondary                                                          | 11               | 19                  |
|                                 | Tertiary studies                                                   | 66               | 74                  |
|                                 | Doctorate                                                          | 3                | 5                   |
|                                 | Some university studies, no degree                                 | 10               | **                  |
|                                 | Total %                                                            | 100              | 100                 |
| <b>Media type*</b>              | Television                                                         | 10               | 12                  |
|                                 | Radio                                                              | 18               | 13                  |
|                                 | (Professional, news) magazine                                      | 9                | 33                  |
|                                 | Press agency                                                       | 3                | 6                   |
|                                 | Online-only media                                                  | 5                | 12                  |
|                                 | Commuter/tabloid newspaper and subscription newspapers             | 43               | 49                  |
|                                 | Online (of offline media title) and other media type mix (no main) | 11.9             | **                  |
|                                 | Total %                                                            | 100              | (multiple response) |
| <b>Employment</b>               | Freelance                                                          | 8                | 10                  |
| <b>Hierarchical role</b>        | (Partial) managing role (chief editor, sectional chief etc.)       | 27               | 33                  |
|                                 | Other (Trainee or Editor)                                          | 73               | 65                  |
|                                 | Total %                                                            | 100              | 100                 |

\*The comparability of these values is limited due to differing data collection (exclusive vs. non-exclusive categories)

\*\* Data not collected in the survey.

Note: Slight differences may be ascribed to structural transformations in the media landscape within the last few years.
